# Supplementary material for: Inhibitory effects of residual Cl − on the NO + CO reaction over a supported Pt catalyst
Source: Royal Society of Chemistry journal article supplement (doi:10.1039/d4cy01545b), 2025-01-01
Supplement: d4cy01545b1.pdf [file d4cy01545b1.pdf]

## Electronic Supplementary Information (ESI)

### Inhibitory effects of residual $\text{Cl}^-$ for NO + CO reaction over the supported Pt catalyst

Kaiqiang Wang, Wenxiao Deng, Rui Cai, Jianming Gu, Hong Yang, Yubing Liu\* and Yining Fan\*

*Key Laboratory of Mesoscopic Chemistry of MOE, School of Chemistry and Chemical Engineering, Nanjing University, Nanjing 210023, China*

#### Corresponding authors

\*Yubing Liu, Email: ybliu@nju.edu.cn

\*Yining Fan, Email: ynfan@nju.edu.cn

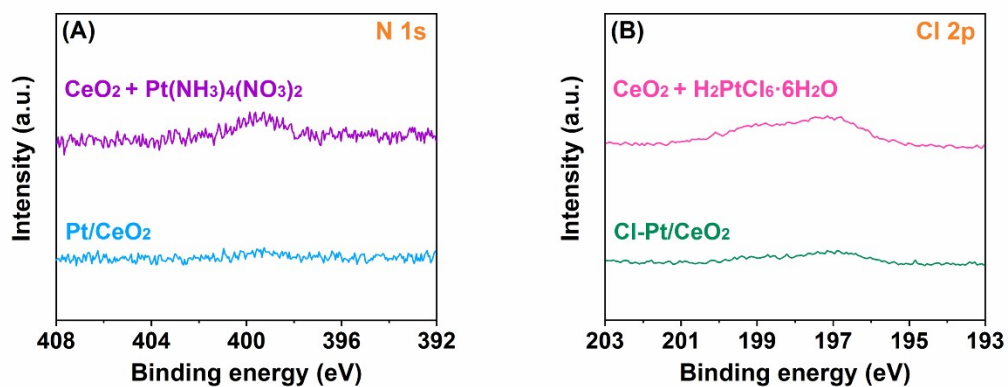

**Fig. S1** N1s and Cl2p XPS of Pt samples (1 wt% Pt)

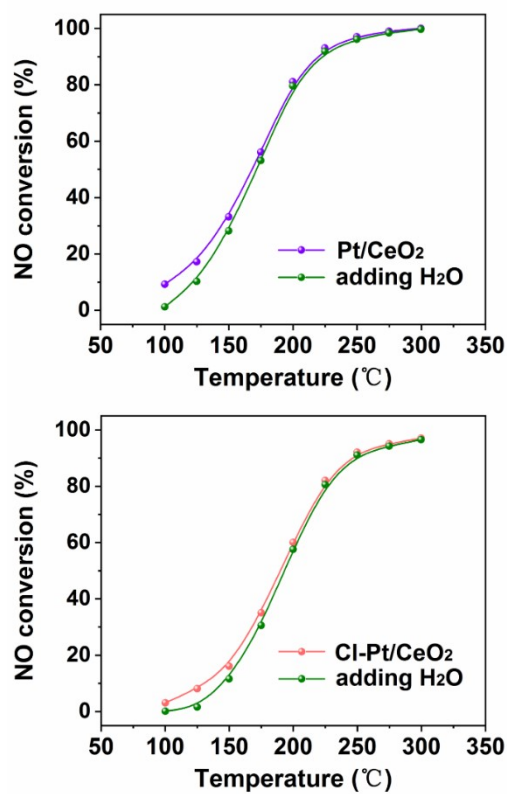

**Fig. S2** NO conversion over two Pt catalysts (1 wt% Pt) with and without adding 5 vol%  $\text{H}_2\text{O}$

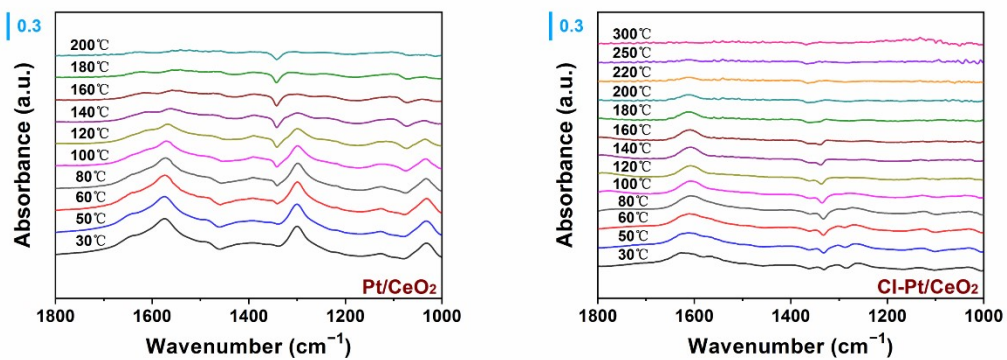

**Fig. S3** *In situ* DRIFTS of CO over two Pt catalysts at 1800–1000 cm<sup>-1</sup>
